# 1 Single-cell imaging of *Pseudomonas* reveals dynamic polar 2 accumulation of the extracellular iron-scavenger pyoverdinin

3 Clara Moreno-Fenoll<sup>1,2,\*</sup>, Maxime Ardré<sup>2</sup>, and Paul B. Rainey<sup>1,2</sup>

4 <sup>1</sup>Laboratory of Biophysics and Evolution, CBI, ESPCI Paris, Université PSL,  
5 CNRS, 75005 Paris, France

6 <sup>2</sup>Department of Microbial Population Biology, Max Planck Institute for  
7 Evolutionary Biology, Plön, Germany

8 \*Corresponding author: [cmorenofenoll@evolbio.mpg.de](mailto:cmorenofenoll@evolbio.mpg.de)

## 9 Abstract

10 Pyoverdinin is a water-soluble metal-chelator synthesized by members of the genus *Pseu-*  
11 *domonas* and used for the acquisition of insoluble ferric iron. Although freely diffusible in aque-  
12 ous environments, preferential dissemination of pyoverdinin among adjacent cells, fine-tuning of  
13 intracellular siderophore concentrations, and fitness advantages to pyoverdinin-producing versus  
14 nonproducing cells, indicate control of location and release. Here, using time-lapse fluores-  
15 cence microscopy to track single cells in growing microcolonies of *Pseudomonas fluorescens*  
16 SBW25, we show accumulation of pyoverdinin at cell poles. Accumulation is induced by arrest  
17 of cell division, is achieved by cross-feeding in pyoverdinin-nonproducing mutants, is indepen-  
18 dent of cell shape, and is reversible. Furthermore, it occurs in multi-species communities.  
19 Analysis of the performance of pyoverdinin-producing and nonproducing cells under conditions  
20 promoting polar localization shows an advantage to accumulation on resumption of growth  
21 after stress. While the genetic basis of polarization remains unclear, evaluation of deletion mu-  
22 tants of pyoverdinin transporters (*opmQ*, *fpvA*) establishes non-involvement of these candidate  
23 loci. Examination of pyoverdinin polar accumulation in a model community and in a range of  
24 laboratory and natural species of *Pseudomonas*, including *P. aeruginosa* PAO1 and *P. putida*  
25 KT2440, confirms that the phenotype is characteristic of *Pseudomonas*.

## 26 Significance

27 Bacteria secrete extracellular products that enable nutrients to be obtained from the environment.  
28 A secreted product of relevance for medicine, agriculture and biotechnology is the iron-chelating

29 siderophore, pyoverdinin, which is produced by members of the genus *Pseudomonas*. By analyzing  
30 the behavior of single cells we show that on cessation of cell division, pyoverdinin localizes to cell  
31 poles, but is then released to the environment prior to resumption of cell growth. Of particular  
32 significance is the ecological relevance of this behavior: cells that accumulate the siderophore resume  
33 growth with minimal delay. Our study reveals a hitherto unrecognized dimension to the biology of  
34 *Pseudomonas* that may prove central to understanding the broader ecological and physiological  
35 relevance of pyoverdinin.

## 36 Introduction

37 Extracellular secreted products perform important functions in microbial communities. They provide  
38 structure and protection [1], enable coordinated action [2] [3] and also allow acquisition of recalcitrant  
39 nutrients, such as polymers that are too large to be internalized [4], or are otherwise unavailable.  
40 An example of the latter is pyoverdinin.

41 Pyoverdinin is a naturally fluorescent iron-scavenging chelator (siderophore) produced by  
42 members of the genus *Pseudomonas* [5]. Iron is an essential micronutrient that exists in an insol-  
43 ule state (ferric) in aerobic environments [6]. In response to intracellular iron scarcity, pyoverdinin  
44 biosynthesis begins in the cytoplasm via nonribosomal peptide synthesis and undergoes maturation  
45 in the periplasm [7]. After secretion, it binds  $\text{Fe}^{3+}$  with high affinity ( $K_a = 10^{32} \text{ M}^{-1}$  for PVDI  
46 produced by *P. aeruginosa* PAO1 [8]). Once bound to ferric iron the ferripyoverdinin complex loses its  
47 fluorescent properties, but is recognized by a specific receptor (FpvA) and imported back into the  
48 periplasm, where iron is extracted. The apo-pyoverdinin molecule is then recycled and can undergo  
49 further cycles of export and import [9].

50 Because pyoverdinin is a soluble extracellular product, it has been widely assumed to be  
51 equally available to all members of a community [10–12]. However, recent work shows that its dis-  
52 tribution is subject to cell-level control. In one study pyoverdinin producers retained an environ-  
53 ment-dependent fitness advantage in conditions where invasion by nonproducers was expected. In light  
54 of these experimental results, the possibility of personalization was raised [13]. Other studies have  
55 further supported this notion. For example, in growing microcolonies, pyoverdinin diffuses primarily  
56 between adjacent cells, reducing loss into the environment [14]. Furthermore, *Pseudomonas aerug-*  
57 *inosa* cells tune periplasmic concentrations of pyoverdinin in order to protect against oxidative stress  
58 [15].

59 Here we use time-lapse fluorescence microscopy to study the relationship between *P. flu-*  
60 *orescens* SBW25 cells and pyoverdinin. Recognizing the importance of spatial structure and contri-  
61 butions therefrom to  $\mu\text{m}$ -scale features of microbial assemblages [16–19], cells were grown on thin  
62 layers of agarose set on top of microscope slides. In actively dividing cells, naturally fluorescent  
63 apo-pyoverdinin is evenly distributed in the periplasm, however, on cessation of growth we observed

64 pyoverdin to localize to cell poles. This surprising discovery motivated quantitative analysis, revealing  
65 the process of localization to be dynamic, reversible, and ecologically relevant.

## 66 Results

67 *P. fluorescens* SBW25 (hereafter SBW25) is a model bacterium [20] known to produce pyoverdin [21]  
68 and other secreted products [22, 23]. In a previous study of pyoverdin, Zhang & Rainey [13] provided  
69 evidence of pyoverdin personalization that was inferred following contrasting outcomes of fitness  
70 assays in different conditions. We reproduced these assays, but rather than examining frequencies  
71 of producers and nonproducers by plating, aliquotes were observed by fluorescence microscopy. In  
72 casamino acids medium (CAA), the medium where an unexpected advantage for pyoverdin producers  
73 had been described, cells exhibited fluorescent foci (Fig. 1 A). This initial observation motivated  
74 further analysis.

75 To accurately characterize subcellular patterns of pyoverdin, time-lapse fluorescence images  
76 of ancestral SBW25 were obtained in defined succinate minimal medium (SMM), where succinate  
77 acts both as carbon source and weak iron chelator. During exponential phase and early stationary  
78 phase, SBW25 cells present the phenotype typical of fluorescent *Pseudomonas* with pyoverdin being  
79 homogeneously distributed in the periplasm. However, in late stationary phase a different phenotype  
80 emerges that involves accumulation of pyoverdin at the cell pole. Polarization of pyoverdin is  
81 evident by qualitative observation (Fig. 1 B) and was verified after image analysis and segmentation  
82 by superposing fluorescence profiles at different time points. (Fig. 1 C).

83 By examining cell division throughout the time-lapse series it is possible to connect time to  
84 population growth. Mean age of cells in the population highlights these different physiological states.  
85 The corresponding frequency of polarized cells (Fig. 2 A) was tracked by classifying segmented cells  
86 automatically as "polarized" and "homogeneous" using a machine learning algorithm (Supplementary  
87 Materials and Methods). After inoculating the microscope slide, cells undergo a period of acclimation  
88 to the medium without division. We observed no polarization events during this lag phase. As division  
89 begins, age of cells in microcolonies decreases until it reaches a minimum that marks exponential  
90 phase. Bacteria continued to be non-polarized. Note that the small frequency of cells identified as  
91 "polarized" in the plot falls within the range of classification errors. Finally, the population enters  
92 stationary phase and cells continue ageing without division. Polarization increased within the first  
93 few hours, encompassing a majority cells within the population at 18h (Fig. S1).

94 While the time-averaged state of microcolonies exposes population-level dynamics of po-  
95 larization – namely, that polarization happens in stationary phase – it obscures the behavior of  
96 individual cells. To specifically analyze single cells, cells were grouped according to their division  
97 status over three generations: F0 for initial inoculum (cells where birth could not be identified but  
98 division was observed), F1 for cells in exponential phase (born from the division of F0 cells and

99 underwent division later) and F2 for the daughter cells of F1 that entered stationary phase and  
100 remained constant for the final hours of the experiment. Growth measurements from F1 cells, and  
101 pyoverdinin accumulation measurements from F2, corroborate, that despite some variability in the  
102 onset of polarization, polarization appears to be strictly incompatible with active cell division. Cells  
103 either elongate or accumulate fluorescence (pyoverdinin) at the cell pole. This result holds for both  
104 the old and new pole (Fig. 2 B). Curiously, the siderophore accumulates preferentially at the new  
105 pole, but not exclusively, and sometimes distinct foci are present at both (Fig. S2.) )

106 Stationary phase marks cessation of cell division due to nutrient depletion. To investigate  
107 the effect of other environmental stresses that interfere with cell division on polarization, bacteria  
108 were treated with either 2,2'-dipyridil (DP, an iron chelator) or tetracycline at concentrations where  
109 no division was observed during 8 h (Fig. S3 A) . Both stresses induced polarization (Fig 2 C). Since  
110 the treatments included chemicals both related and unrelated to pyoverdinin regulation, a iron-chelator  
111 and antibiotic, respectively, arrest of cell division is likely the trigger for the polar-accumulation  
112 phenotype, rather than a specific environmental cue, such as nutrient depletion.

113 Precisely because polarization appears when cells are starved and/or stressed, processes  
114 associated with cell death, such as cell wall damage, are potential elicitors. Based on ability to  
115 reliably induce polarization by adding an iron chelator (Fig 2 C) a protocol was developed to assess  
116 the viability of cells with polarized pyoverdinin. This involved transfer of bacteria pre-treated with DP  
117 to a fresh agarose pad. Time-lapse imaging of these cells revealed that polarization is reversible and  
118 precedes exit from lag phase (Fig 2 D). Polarized cells consistently re-established a homogeneous  
119 pyoverdinin distribution within the first few hours after inoculation, with elongation and division  
120 resuming at a later time point (Fig. S3 B). Note that both the initial frequency of polarized cells and  
121 the time to depolarization were counted from from the start of image acquisition. During the previous  
122 experimental manipulation, some individuals might have altered their polarization status. Despite  
123 this, the trend is clear, with depolarization occurring before resumption of growth. Polarization is  
124 thus not a consequence of cell death but rather a reversible, dynamic process tied to arrest of cell  
125 division.

126 To explore population-level consequences of pyoverdinin accumulation, growth delay of cells  
127 was measured in a range of environments where pyoverdinin has physiological relevance. SBW25, or  
128 the pyoverdinin nonproducing mutant *pvdS229(D77N)* [13] (termed Pvd<sup>-</sup> here), were pre-grown either  
129 in iron-restrictive or permissive SMM and then transferred to fresh SMM medium. Comparing con-  
130 ditions in which pyoverdinin is polarized and not polarized, and cells that can and cannot accumulate  
131 pyoverdinin, stands as a test for functional implications arising from polarization. To ensure that the  
132 observed effects are related to iron deprivation and ensuing effects of pyoverdinin on physiology, all  
133 tested conditions also received a supplement of excess iron. In non-restrictive conditions, without  
134 chelator supplementation, pyoverdinin did not introduce a substantial difference: SBW25 and Pvd<sup>-</sup>  
135 showed similar lag times before resuming division in fresh medium. Iron supplementation did not  
136 modify lag times (Fig 3 A, left). However, exposure to iron-deprived conditions led to a considerable  
137 delay in the time to the first cell division for cells that had no accumulated pyoverdinin. SBW25 cells

138 with polarized pyoverdin also showed longer lag phases after iron deprivation, but to a much lesser  
139 extent. In these conditions iron supplementation had a significant impact, again reducing the lag  
140 phase of the non-producer mutant to values similar to the ancestral producer (Fig. 3 A, right). This  
141 suggests that pyoverdin stockpiled at the cell poles during conditions where it is presumably not used  
142 (pyoverdin accumulates when cells are not dividing), enables faster recovery when the environment  
143 is again amenable to growth.

144         Dissociation of pyoverdin from the cell pole does not necessarily imply that it has been  
145 secreted. Intracellular iron can cause toxic oxygen reactive species, and the siderophore is known to  
146 protect cells from oxidative damage while remaining in the periplasm [15]. To distinguish this from  
147 an effect derived from pyoverdin in the external medium, we separately deprived both SBW25 and  
148 nonproducer cells of iron, and then co-inoculated both strains on the same fresh agarose pad. In this  
149 setting, changes in behavior of the nonproducer can be reasonably attributed to pyoverdin released  
150 by the producer. Upon co-inoculation, mutants displayed reduced lag times comparable to ancestral  
151 SBW25 (Fig. 3 B). Pyoverdin is thus secreted by the producer after depolarization and used by  
152 both strains to acquire essential iron from the environment. Furthermore, the amount of pyoverdin  
153 accumulated during starvation seems to be enough to support at least twice as many cells, as the  
154 lag time of SBW25 producer cells was not affected by the presence of nonproducers. This result is  
155 in line with other work, where populations of siderophore-producing *Pseudomonas* were shown to  
156 grow in the presence of numerous nonproducing mutants without causing a significant reduction in  
157 yield [24].

158         Pyoverdin polarization seems to be tied to particular physiological states. Just how po-  
159 larization is integrated within the biology of cells requires mechanistic molecular knowledge. We  
160 envisioned different scenarios that might lead to transport of pyoverdin to cell poles and subsequent  
161 accumulation. One possibility is that pyoverdin is passively accumulated at the cell pole as a conse-  
162 quence of the rod shape of *Pseudomonas* cells. Alternatively, localization could be driven by specific  
163 biomolecular features of the cell pole, for example, transport via proteins that recognize signals of  
164 polar identity. Either of these processes could in turn be unique to pyoverdin, or general phenomena  
165 affecting the contents of the periplasm of SBW25. To investigate these possibilities we examined  
166 mutants with specific gene deletions, both in the pyoverdin pathway and in other cellular processes  
167 that could be feasibly involved in polarization.

168         First, we verified that the accumulated pyoverdin is mature and functioning, as opposed  
169 to being an aberrant molecular form with defective periplasmic maturation [25]. Cross-feeding  
170 experiments (Fig. 3 B) demonstrate that nonproducers can use pyoverdin secreted by SBW25  
171 producer cells where pyoverdin was previously polarized. However, this does not eliminate the  
172 possibility that polarized pyoverdin is structurally defective; for example, polarization and growth  
173 recovery could be caused by different pyoverdin molecules, with the former being non-functional.  
174 To test this, SBW25 producer and nonproducer types (the latter with an mCherry fluorescent  
175 marker) were co-cultured. After overnight growth (17 h in the conditions previously described, Fig.  
176 1) colonies of the nonproducer had polarized pyoverdin (Fig. 4.1). This indicates that polarized

177 pyoverdinin is functional, since any siderophore internalized by Pvd<sup>-</sup> necessarily comes from the external  
178 medium after export by SBW25. Polarization thus involves pyoverdinin that is actively used among  
179 cells of the population.

180 Next, we considered trafficking of pyoverdinin across the periplasm. An imbalance could lead  
181 to an excess of molecules aggregating at the exporter or the receptor, which in turn could result in  
182 polarization [26, 27]. After deleting the gene encoding the efflux pump OpmQ, intracellular levels of  
183 pyoverdinin increased (Fig. S4 A), but secretion was not completely abolished. This is not surprising  
184 as it is known that additional pyoverdinin transporters exist, although their identity is largely unknown  
185 [28]. This  $\Delta opmQ$  mutant, however, displayed polarization similar to SBW25, thus eliminating  
186 OpmQ as a candidate for the mechanism (Fig. 4.2).

187 Unravelling a role for the ferripyoverdinin receptor FpvA is more complicated, because syn-  
188 thesis, via a positive feedback loop, is determined by the interaction between ferripyoverdinin and  
189 the FpvA receptor. As a consequence,  $\Delta fpvA$  mutants produce only basal levels of the siderophore  
190 [7] (Fig. S4 B). Nevertheless, a small fraction of cells manufactured pyoverdinin at higher levels -  
191 possibly due to noise in the gene regulatory circuits. In these cells fluorescence accumulation at the  
192 pole was observed (Fig. 4.3). FpvA is therefore not directly responsible for polarization. Additional  
193 possibilities for localization are conceivably connected to extracellular polymer synthesis and cell  
194 morphology. SBW25 secretes cellulose which can act as a glue for the construction of bacterial  
195 mats at the air-liquid interface [23]. This sticky polymer could trap the iron scavenger in an ex-  
196 tracellular mesh attached to the cell. However, the cellulose nonproducer  $\Delta wsp\Delta aws\Delta mws$  [29]  
197 polarizes pyoverdinin in a manner comparable to ancestral SBW25 (Fig. 4.4). Finally, the rod-cell-  
198 shape that is characteristic of *Pseudomonas* was considered as a possible contributory factor. To  
199 test this we looked for pyoverdinin accumulation in a spherical  $\Delta mreB$  mutant. Despite the spherical  
200 shape, this strain displayed fluorescence foci after extended culture (Fig. 4.5). The mechanistic  
201 details of pyoverdinin polarization remain to be discovered, but mutants analyzed here constrain the  
202 range of possibilities. The most readily available explanations that involve imbalances in pyoverdinin  
203 trafficking are largely eliminated, and the behavior of  $\Delta mreB$  indicates that siderophore transport  
204 to the poles is not an incidental consequence of cell shape.

205 We further tested pyoverdinin polarization in conditions closer to the natural milieu of  
206 SBW25, where species interdependencies are common and resources invariably limiting. To im-  
207 plement a minimal bacterial community, SBW25 was co-cultured with a cellulose-degrading *Bacillus*  
208 isolated from a compost heap [30]. Because SBW25 is unable to degrade this polymer, it must  
209 rely on the *Bacillus* species to obtain carbon for growth. These two strains were grown together in  
210 minimal medium with cellulose paper as the sole carbon source and periodically imaged to assess po-  
211 larization status. Pyoverdinin was readily observed to be polarized (Fig 5 A). Pyoverdinin accumulation  
212 at the cell pole is thus likely to be part of the natural phenotypic repertoire of SBW25, and given  
213 that conditions such as those experienced here are likely typical, polarization of pyoverdinin might be  
214 the normal state.

215 Since pyoverdins are produced by many species of the genus *Pseudomonas*, investigating  
216 subcellular distribution in related strains stands to provide an evolutionary context for polar accu-  
217 mulation. We selected 11 strains belonging to the genus *Pseudomonas*, comprising both common  
218 laboratory strains (such as *P. aeruginosa* PAO1, in which pyoverdin is usually studied) and natural  
219 isolates from different European locations. The ability of these strains to polarize pyoverdin was  
220 classified qualitatively, that is, presence or absence of polarized cells (Fig 5 B.) All tested strains  
221 localized pyoverdin at the cell poles in conditions similar to those described here for SBW25. Inter-  
222 estingly, different strains polarized pyoverdin with treatments of varying stringency. In some cases  
223 extended culture in SMM was enough to observe the phenotype (eg. *P. putida* KT2440). In others,  
224 amendment with an iron chelator was necessary to observe the effect (eg. *P. aureofaciens* U149),  
225 at the same dosage that induced polarization in SBW25, and in the specific case of *P. aeruginosa*  
226 PAO1, very high doses of DP were required. This range of responses could reflect the secretion of  
227 secondary siderophores by some strains [32] or differences in the regulation of pyoverdin production  
228 [12], and suggest that polarization is an ecologically relevant trait that varies depending on the  
229 evolutionary history of the lineage.

## 230 Discussion

231 Previous work showing that the population-level distribution of pyoverdin changes depending on  
232 nutrient status [13], contact with neighboring cells [14], or environmental stress [15] motivated  
233 our investigation. With focus on *P. fluorescens* SBW25, and using time-resolved microscopy, we  
234 have shown that pyoverdin transiently accumulates at cell poles; and that localization is a reversible  
235 process associated with arrest of cell division and affected by factors such as entry into stationary  
236 phase, deprivation of specific nutrients, and antibiotic treatment (Fig 2). Particularly significant is  
237 demonstration that accumulation of pyoverdin has ecological relevance.

238 Dynamic localization of proteins at bacterial cell poles is not unusual: various cellular  
239 structures are localized to either new or old poles [33]. In some instances, localization is determined  
240 via specific protein interactions, while in others, mechanisms, involving, for example, nuclear occlu-  
241 sions at the cytoplasm, are responsible [34]. In *P. aeruginosa* complexes termed "siderosomes" form  
242 by association of the enzyme L-ornithine N5-oxygenase (encoded by *pvdA*) with the cytoplasmic  
243 membrane, causing pyoverdin synthesis to be localized to old cell poles [35, 36].

244 The possibility that pyoverdin synthesis might be connected to pyoverdin accumulation  
245 was considered plausible, although unlike accumulation observed in SBW25, siderosomes are active  
246 during exponential growth and localized primarily to old cell poles. Evidence that indicates synthesis  
247 and accumulation are determined by distinct processes stems from analysis of SBW25 cells devoid of  
248 functional *pvdS* ( $Pvd^-$ , Fig. 4) – and thus devoid of all enzymes necessary for synthesis of pyoverdin  
249 (including *pvdA*). When co-cultured with SBW25 pyoverdin-producing cells, *pvdS* mutant cells  
250 accumulated pyoverdin from the external environment at the cell poles. Transcription of pyoverdin

251 biosynthetic genes is thus not required for polar accumulation of pyoverdinin.

252 Recognition that pyoverdinin accumulation is unconnected to synthesis caused attention to  
253 shift to involvement of pyoverdinin uptake and recycling systems. To this end, genes encoding the  
254 primary outer membrane receptor for the ferri-pyoverdinin complex, FpvA, and primary component  
255 of the pyoverdinin recycling (export) system, OmpQ, were deleted. Both  $\Delta fpvA$  and  $\Delta ompQ$  were  
256 able to accumulate and localize pyoverdinin (Fig. 4). While thus far we have failed to identify any  
257 genetic basis for accumulation, ability to rule out primary and obvious candidates narrows the scope  
258 for future investigations.

259 While pyoverdinin was found most often accumulated at the new pole, it was also observed  
260 at the old pole, and on occasion it was found at both poles. Lack of location specificity hints at a  
261 connection to more general biophysical aspects of cell biology. Interestingly, a recent study of *E. coli*  
262 under starvation conditions showed polar accumulation of fluorescent markers, including mCherry  
263 [37]. Accumulation was connected to shrinkage of the cytoplasm, with shrinkage creating additional  
264 space in the polar region of the periplasm.

265 Certain of the dynamics observed by Shi et al (2021) [37] are consistent with our observa-  
266 tions, however, some observations are difficult to reconcile with experimental details and the known  
267 biology of pyoverdinin. For example, polarization of mCherry occurred in the periplasm of *E. coli* soon  
268 after starvation, but these cells maintained high ATP levels typical of exponentially growing cells.  
269 There is no reason to assume that such metabolically active cells would be compromised in ability to  
270 import or export pyoverdinin, and therefore it is difficult to conceive of reasons why SBW25 would be-  
271 gin to accumulate pyoverdinin if metabolic activity was not compromised. Further, pyoverdinin, a small  
272 diffusible molecule, is unlikely to behave as observed for an engineered periplasm-targeted mCherry  
273 reporter. In *E. coli* cytoplasmic contraction occurs upon starvation and was not affected by antibiotic  
274 treatment. In contrast, in SBW25, localized accumulation of pyoverdinin occurred under starvation  
275 conditions, but also on cessation of growth caused by addition of tetracycline to cells present in an  
276 otherwise resource-permissive environment (Fig. 2 C). Also of relevance are our investigations of the  
277 distribution of pyoverdinin in spherical  $\Delta mreB$  cells. Despite absence of poles, pyoverdinin accumulated  
278 in discrete regions on starvation (Fig. 4). It would be interesting to investigate localization of  
279 mCherry in morphology mutants of *E. coli*.

280 Irrespective of the mechanism, whether it be connected to cytoplasmic shrinkage, some  
281 other physical aspect of cell biology, determined by a specific genetic pathway, or a combination  
282 of physical and genetic factors, our results demonstrate that localization of pyoverdinin has ecolog-  
283 ical significance. Data in Fig. 3 A show that cells with localized pyoverdinin resume growth more  
284 rapidly than cells that have not accumulated reserves of pyoverdinin. This time-to-first cell division  
285 advantage was not evident when growth-arrested cells were transferred to iron-replete conditions.  
286 This demonstrates that liberation of the stock of pyoverdinin accumulated during growth cessation  
287 has fitness consequences, presumably through provision of available iron to growing cells, as Fig. 3  
288 B indicates.



289 The seemingly adaptive nature of pyoverdinin accumulation under stress is reminiscent of  
290 – and perhaps even connected to – the capacity of SBW25 to enter a semiquiescent capsulated  
291 state upon starvation. Counter to received wisdom, during starvation, SBW25 cells produce an  
292 excess of ribosomes that allow rapid exit from stationary phase once growth-permissive conditions  
293 are encountered. Cells unable to provision ribosomes are quickly out-competed by those that do  
294 [38]. It is possible that localization of pyoverdinin, followed by fast release under growth permissive  
295 conditions, has evolved as a strategy precisely because it maximizes competitive performance upon  
296 resumption of growth. The decision to enter stationary phase is just as significant as the means of  
297 exiting. Rapid resumption of growth is likely to deliver significant fitness benefits in environments  
298 punctuated by periods of nutrient abundance and scarcity.

299 There has been a tendency to observe diffusible products through the lens of social evolu-  
300 tion theory, where products are viewed as public goods, and producers and nonproducers considered  
301 players in a game of prisoner’s dilemma. Accordingly, populations of producers, when rare, should  
302 not invade populations of nonproducers. This expectation arises from a presumed cost to production,  
303 combined with the assumption that the extracellular product is equally available to both producers  
304 and nonproducers. However, a number of studies have shown that this simple expectation does not  
305 always hold, leading to the suggestion that producers might gain preferential access to the secreted  
306 product [12, 13, 39, 40].

307 Investigations at the level of individual cells have proved essential for linking behavior of  
308 cells to the dynamics of populations [17, 18]. For example, Gore et al (2009) [39] showed that  
309 the cellular location of invertase responsible for degradation of sucrose in *Saccharomyces cerevisiae*  
310 creates diffusion gradients of degradation products that deliver benefit to producing cells, despite cost  
311 to producers of synthesizing the enzyme [39]. Similarly, the siderophore enterochelin (a catecholate  
312 secreted by *E. coli* and other *Enterobacteriaceae*) can remain associated with the outer membrane  
313 under conditions of low cell density, delivering preferential benefit to enterochelin-producing cells  
314 [40]. Our findings show clear evidence that pyoverdinin can be localized, and while localization also  
315 occurs in nonproducing mutants (via uptake from producer cells) – and can deliver fitness benefits to  
316 nonproducers – producers consistently show a faster time to the first cell division (Fig. 3) compared  
317 to nonproducing types. This is in agreement with data showing that producers can gain preferentially  
318 from the product they synthesize [13]. It is likely that behaviors such as those observed here are  
319 important contributors to population – and even community – dynamics in natural environments.

320 The eco-physiology of pyoverdinin is complex and poorly understood. Advances in under-  
321 standing are key to making biological, ecological and evolutionary sense of behaviors such as those  
322 described here [12, 41]. Complexity arises at the physiological level from the interplay between the  
323 redox status of iron (that affects bio-availability), and cellular demands that are balanced against  
324 potentially lethal toxic effects. For example, in aerobic environments, where bio-availability of iron  
325 is low and cellular demand high, cells risk harm from hydroxyl radicals liberated via the Fenton reac-  
326 tion. One role of pyoverdinin is as protectant against intracellular oxidative stress [15]. But pyoverdinin  
327 has roles beyond iron-specific chemistry: pyoverdinin chelates other metals, including magnesium, zinc

328 and gallium, with roles in homeostasis and detoxification of these and other metals [28]. Challenges  
329 arise from the need to understand the ecological relevance of numerous diverse forms of pyoverdin  
330 [32], the plethora of ferri-pyoverdin receptors [42, 43], and the various roles of pyoverdin in shaping  
331 interactions with eukaryotic hosts [44–46].

332 Complexity further escalates once pyoverdin is placed in context of microbial communi-  
333 ties, where roles for pyoverdin are evident [47–52], and where community function affects physico-  
334 chemical factors such as pH, viscosity, moisture, and resources (type and abundance), all of which  
335 are subject to frequent change [53, 54]. Although we have not delved into these complexities,  
336 the fact that pyoverdin is accumulated and localized under growth limiting conditions in a diverse  
337 range of *Pseudomonas*, combined with evidence of the same behavior in SBW25 cells grown for  
338 weeks under nutrient restrictive conditions with reliance on cellulose degrading *Bacillus* (Fig. 5),  
339 suggests that polarization has relevance to conditions beyond those experienced by cells in standard,  
340 nutritionally-rich, exponential-phase, laboratory culture.

## 341 **Materials and methods**

342 **Strains, culture media, and reagents.** Ancestral *Pseudomonas fluorescens* SBW25 originally  
343 isolated on beet roots at the University of Oxford farm (Wytham, Oxford, U.K.) [20] and a collection  
344 of relevant mutants were used: the pyoverdin nonproducer *pvdsG229A*(D77N) named Pvd<sup>-</sup> in the  
345 main text (construction described in [13]), the corresponding strain with mCherry fluorescence  
346 tagging under IPTG induction,  $\Delta mreB$ , PBR716 ( $\Delta wsp\Delta aws\Delta mws$ , described in [29]). Pyoverdin  
347 import and export defective mutants  $\Delta PFLU3979$  (OpmQ) and  $\Delta PFLU2545$  (FpvA) were created  
348 by two-step allelic exchange [55]. A neutrally marked SBW25 strain [56] was used to replicate  
349 the fitness assays from [13]. *Escherichia coli* DH5 $\alpha$   $\lambda_{pir}$  and pRK2013 were used for cloning.  
350 *Bacillus* 002.IH from Steven Quistad's compost heap collection [30] was used for the community  
351 experiment. For the phylogenetic comparison, an assortment of species of the genus *Pseudomonas*  
352 were selected from the lab collection. Most experiments were performed in succinate minimal  
353 medium (SMM, described in [14]). Overnight cultures were done in Luria-Bertani (LB) broth.  
354 Replication of fitness assays was performed in CAA and KB media as described in the original  
355 work [13]. Community experiment was done in M9 minimal medium with cellulose as the only  
356 carbon source (Whatman). Where indicated media was supplemented with 2,2'-dipyridil (Sigma),  
357 tetracycline (Duchefa, France), Fe<sub>2</sub>[SO<sub>4</sub>]<sub>3</sub>(III) (Sigma), IPTG (Melford). For strain construction  
358 tetracycline, nitrofurantoin (Sigma), X-gal (Melford), D-cycloserine (Duchefa) were used.

359 **Agarose pad.** To prepare the agarose pad, 220  $\mu$ L of agarose (Melford) dissolved in SMM  
360 (2% w/v) were poured onto a microscope slide fitted with a sticky frame (Gene Frame, Fisher  
361 Scientific), pressed with a clean slide and allowed to dry for  $\sim$  2 min. A small  $\sim$  3 mm section of  
362 the pad and frame was cut across the slide to provide air for the growing cells. 1.5  $\mu$ L of washed  
363 culture was inoculated on the agarose pad and sealed with a coverslip.

364 **Microscopy.** Inoculated agarose pads were monitored by taking snapshots every 30 min  
365 for a typical total time of 18h using the microscope Axio Observer.Z1 (Zeiss, Germany). Cells were  
366 imaged under phase contrast (exposure: 30 ms) and fluorescence corresponding to Pvd using the  
367 fluorescence Source X-Cite 120 LED and the following filters: 390/40 BrightLine HC, Beamsplitter  
368 T 425 LPXR, 475/50 BrightLine HC (exposure: 30 ms, 12 % intensity). Images were taken with  
369 63x and optovar 1.6x magnification.

370 **Image analysis.** Image processing was performed using the image analysis software Image  
371 J. Segmentation and analysis was performed using the package for Matlab SuperSegger from the  
372 Wiggins Lab [57]. Further analysis and data visualization was carried out with the programming  
373 software R. After segmentation cells were sorted by polarization status using a classifier obtained  
374 with the Statistics and Machine Learning Toolbox for Matlab (More information in Supplementary  
375 Methods).

376 **Community experiment.** SBW25 and *Bacillus* 002.IH (from [30]) were grown on 20 ml  
377 M9 minimal medium and cellulose as the only carbon source (1 cm x 1 cm cellulose paper). After  
378 overnight growth cultures were washed and co-inoculated into 20 ml of M9 medium with cellulose  
379 paper in a 60 ml vial. These vials were incubated at room temperature with unscrewed caps to allow  
380 air exchange, and periodically sampled for imaging.

381 **Phylogenetic comparison.** A collection of laboratory and natural strains belonging to  
382 the genus *Pseudomonas* were subjected to a binary qualitative polarization test, i.e. the test was  
383 considered positive if polarized cells were observed under fluorescence microscopy in conditions  
384 similar to SBW25 but no dynamics were assessed. Commonly used laboratory strains *P. aeruginosa*  
385 PAO1 and *P. putida* KT2440 were tested. Natural isolates belong to collections from two different  
386 locations. Paris, France [30]: T24 V1a, T24 V9b, T24 H1b, T24H9b; all classified as *P. putida*.  
387 Oxford, UK [31]: *P. marginalis* U106, *P. putida* U177, *P.aureofaciens* U149, U180, and U181.

## 388 **Author contributions**

389 PBR, CMF and MA designed research. CMF performed research. CMF and MA analyzed data.  
390 PBR, CMF and MA wrote the paper.

## 391 **Conflicts of interest**

392 The authors declare no competing interests.

## 393 Acknowledgements

394 We thank Dave Rogers for assistance with construction of mutants. We thank Steven D. Quistad  
395 and Xue-Xian Zhang for natural strain collections. PBR acknowledges generous core support from  
396 the Max Planck Society.

## 397 References

- 398 1. Flemming, H.-C. *et al.* Biofilms: an emergent form of bacterial life. *Nature Reviews Microbiol-*  
399 *ogy* **14**, 563–575 (2016).
- 400 2. Newman, J. W., Floyd, R. V. & Fothergill, J. L. The contribution of *Pseudomonas aerugi-*  
401 *nosa* virulence factors and host factors in the establishment of urinary tract infections. *FEMS*  
402 *Microbiology Letters* **364** (2017).
- 403 3. Diard, M. *et al.* Stabilization of cooperative virulence by the expression of an avirulent pheno-  
404 type. *Nature* **494**, 353–356 (2013).
- 405 4. Gilkes, N. R., Kilburn, D. G., Miller, R. C. & Warren, R. A. Bacterial cellulases. *Bioresource*  
406 *Technology* **36**, 21–35 (1991).
- 407 5. Meyer, J. M. & Abdallah, M. A. The fluorescent pigment of *Pseudomonas fluorescens*: Biosyn-  
408 thesis, purification and physicochemical properties. *Journal of General Microbiology* **107** (1978).
- 409 6. Neilands, J. B. Iron absorption and transport in microorganisms. *Annual review of nutrition* **1**  
410 (1981).
- 411 7. Ringel, M. T. & Brüser, T. The biosynthesis of pyoverdines. *Microbial cell* **5**, 424–437 (2018).
- 412 8. Albrecht-Gary, A. M., Blanc, S., Rochel, N., Ocaktan, A. Z. & Abdallah, M. A. Bacterial iron  
413 transport: coordination properties of pyoverdin PaA, a peptidic siderophore of *Pseudomonas*  
414 *aeruginosa*. *Inorganic Chemistry* **33** (1994).
- 415 9. Bonneau, A., Roche, B. & Schalk, I. J. Iron acquisition in *Pseudomonas aeruginosa* by the  
416 siderophore pyoverdine: an intricate interacting network including periplasmic and membrane  
417 proteins. *Scientific Reports* **10**, 120 (2020).
- 418 10. West, S. A., Diggle, S. P., Buckling, A., Gardner, A. & Griffin, A. S. The social lives of  
419 microbes. *Annual Review of Ecology, Evolution, and Systematics* **38**, 53–77 (2007).
- 420 11. Buckling, A. *et al.* Siderophore-mediated cooperation and virulence in *Pseudomonas aerugi-*  
421 *nosa*. *FEMS Microbiology Ecology* **62**, 135–141 (2007).
- 422 12. Rainey, P. B., Desprat, N., Driscoll, W. W. & Zhang, X.-X. Microbes are not bound by socio-  
423 biology: Response to Kümmerli and Ross-Gillespie (2013). *Evolution* **68**, 3344–3355 (2014).
- 424 13. Zhang, X.-X. & Rainey, P. B. Exploring the sociobiology of pyoverdin-producing *Pseudomonas*.  
425 *Evolution* **67**, 3161–3174 (2013).

- 426 14. Julou, T. *et al.* Cell-cell contacts confine public goods diffusion inside *Pseudomonas aeruginosa*  
427 clonal microcolonies. *Proceedings of the National Academy of Sciences of the United States*  
428 *of America* **110**, 12577–82 (2013).
- 429 15. Jin, Z. *et al.* Conditional privatization of a public siderophore enables *Pseudomonas aeruginosa*  
430 to resist cheater invasion. *Nature Communications* **9**, 1383 (2018).
- 431 16. Hansen, S. K., Rainey, P. B., Haagenen, J. A. & Molin, S. Evolution of species interactions  
432 in a biofilm community. *Nature* **445** (2007).
- 433 17. Cordero, O. X. & Datta, M. S. Microbial interactions and community assembly at microscales.  
434 *Current Opinion in Microbiology*, 227–234 (2016).
- 435 18. Co, A. D., van Vliet, S., Kiviet, D. J., Schlegel, S. & Ackermann, M. Short-range interactions  
436 govern the dynamics and functions of microbial communities. *Nature Ecology and Evolution*  
437 **4**, 366–375 (2020).
- 438 19. Hartmann, R. *et al.* Emergence of three-dimensional order and structure in growing biofilms.  
439 *Nature Physics* **15**, 251–256 (2019).
- 440 20. Silby, M. W. *et al.* Genomic and genetic analyses of diversity and plant interactions of *Pseu-*  
441 *domonas fluorescens*. *Genome Biology* **10**, R51 (2009).
- 442 21. Moon, C. D. *et al.* Genomic, genetic and structural analysis of pyoverdine-mediated iron ac-  
443 quisition in the plant growth-promoting bacterium *Pseudomonas fluorescens* SBW25. *BMC*  
444 *Microbiology* **8**, 7 (2008).
- 445 22. Hammerschmidt, K., Rose, C. J., Kerr, B. & Rainey, P. B. Life cycles, fitness decoupling and  
446 the evolution of multicellularity. *Nature* **515**, 75–9 (2014).
- 447 23. Spiers, A. J., Kahn, S. G., Bohannon, J., Travisano, M. & Rainey, P. B. Adaptive divergence  
448 in experimental populations of *Pseudomonas fluorescens*. I. Genetic and phenotypic bases of  
449 wrinkly spreader fitness. *Genetics*, 33–46 (2002).
- 450 24. Özkaya, Ö., Balbontín, R., Gordo, I. & Xavier, K. B. Cheating on cheaters stabilizes cooperation  
451 in *Pseudomonas aeruginosa*. *Current Biology* **28**, 2070–2080.e6 (2018).
- 452 25. Yeterian, E. *et al.* Synthesis of the siderophore pyoverdine in *Pseudomonas aeruginosa* involves  
453 a periplasmic maturation. *Amino Acids* **38**, 1447–1459 (2010).
- 454 26. Yeterian, E., Martin, L. W., Lamont, I. L. & Schalk, I. J. An efflux pump is required for  
455 siderophore recycling by *Pseudomonas aeruginosa*. *Environmental Microbiology Reports* **2**,  
456 412–418 (2009).
- 457 27. Schalk, I. J. *et al.* Iron-free pyoverdin binds to its outer membrane receptor FpvA in *Pseu-*  
458 *domonas aeruginosa*: a new mechanism for membrane iron transport. *Molecular Microbiology*  
459 **39**, 351–361 (2001).
- 460 28. Schalk, I. J. & Guillon, L. Pyoverdine biosynthesis and secretion in *Pseudomonas aeruginosa* :  
461 implications for metal homeostasis. *Environmental Microbiology* **15**, 1661–1673 (2013).

- 462 29. McDonald, M. J., Gehrig, S. M., Meintjes, P. L., Zhang, X.-X. & Rainey, P. B. Adaptive  
463 divergence in experimental populations of *Pseudomonas fluorescens*. IV. Genetic constraints  
464 guide evolutionary trajectories in a parallel adaptive radiation. *Genetics* **183**, 1041–53 (2009).
- 465 30. Quistad, S. D., Doulcier, G. & Rainey, P. B. Experimental manipulation of selfish genetic  
466 elements links genes to microbial community function. *Philosophical Transactions of the Royal  
467 Society B: Biological Sciences* **375**, 20190681 (2020).
- 468 31. Zhang, X.-X. *et al.* Genotypic and phenotypic analyses reveal distinct population structures  
469 and ecotypes for sugar beet-associated *Pseudomonas* in Oxford and Auckland. *Ecology and  
470 Evolution* **10**, 5963–5975 (2020).
- 471 32. Cornelis, P. & Matthijs, S. Diversity of siderophore-mediated iron uptake systems in fluorescent  
472 pseudomonads: Not only pyoverdines. *Environmental Microbiology* **4**, 787–798 (2002).
- 473 33. Shapiro, L., McAdams, H. H. & Losick, R. Generating and exploiting polarity in bacteria.  
474 *Science* **298**, 1942–1946 (2002).
- 475 34. Laloux, G. & Jacobs-Wagner, C. How do bacteria localize proteins to the cell pole? *Journal of  
476 Cell Science* **127** (2013).
- 477 35. Guillon, L., El Mecherki, M., Altenburger, S., Graumann, P. L. & Schalk, I. J. High cellular  
478 organization of pyoverdine biosynthesis in *Pseudomonas aeruginosa*: clustering of PvdA at the  
479 old cell pole. *Environmental Microbiology* **14**, 1982–1994 (2012).
- 480 36. Gasser, V., Guillon, L., Cunrath, O. & Schalk, I. Cellular organization of siderophore biosynthesis  
481 in *Pseudomonas aeruginosa*: Evidence for siderosomes. *Journal of Inorganic Biochemistry* **148**,  
482 27–34 (2015).
- 483 37. Shi, H. *et al.* Starvation induces shrinkage of the bacterial cytoplasm. *Proceedings of the  
484 National Academy of Sciences* **118**, e2104686118 (2021).
- 485 38. Remigi, P. *et al.* Ribosome provisioning activates a bistable switch coupled to fast exit from  
486 stationary phase. *Molecular Biology and Evolution* **36**, 1056–1070 (2019).
- 487 39. Gore, J., Youk, H. & van Oudenaarden, A. Snowdrift game dynamics and facultative cheating  
488 in yeast. *Nature* **459**, 253–6 (2009).
- 489 40. Scholz, R. L. & Greenberg, E. P. Sociality in *Escherichia coli*: Enterochelin is a private good at  
490 low cell density and can be shared at high cell density. *Journal of Bacteriology* **197**, 2122–2128  
491 (2015).
- 492 41. Tarnita, C. E. The ecology and evolution of social behavior in microbes. *Journal of Experimental  
493 Biology* **220** (2017).
- 494 42. Smith, E. E., Sims, E. H., Spencer, D. H., Kaul, R. & Olson, M. V. Evidence for diversifying  
495 selection at the pyoverdine locus of *Pseudomonas aeruginosa*. *Journal of Bacteriology* **187**,  
496 2138–2147 (2005).
- 497 43. Bodilis, J. *et al.* Distribution and evolution of ferripyoverdine receptors in *Pseudomonas aerug-  
498 inosa*. *Environmental Microbiology* **11**, 2123–2135 (2009).

- 499 44. Minandri, F. *et al.* Role of iron uptake systems in pseudomonas aeruginosa virulence and airway  
500 infection. *Infection and Immunity* **84**, 2324–2335 (2016).
- 501 45. Taguchi, F. *et al.* The siderophore pyoverdine of Pseudomonas syringae pv. tabaci 6605 is  
502 an intrinsic virulence factor in host tobacco infection. *Journal of Bacteriology* **192**, 117–126  
503 (2010).
- 504 46. Trapet, P. *et al.* The Pseudomonas fluorescens siderophore pyoverdine weakens Arabidopsis  
505 thaliana defense in favor of growth in iron-deficient conditions. *Plant physiology* **171**, 675–93  
506 (2016).
- 507 47. Kloepper, J. W., Leongt, J., Teintzet, M. & Schroth, M. N. Enhanced plant growth by  
508 siderophores produced by plant growth-promoting rhizobacteria. *Nature* **286**, 885–886 (1980).
- 509 48. Haas, D. & Défago, G. Biological control of soil-borne pathogens by fluorescent pseudomonads.  
510 *Nature Reviews Microbiology* **3**, 307–319 (2005).
- 511 49. Stilwell, P., Lowe, C. & Buckling, A. The effect of cheats on siderophore diversity in Pseu-  
512 domonas aeruginosa. *Journal of Evolutionary Biology* **31**, 1330–1339 (2018).
- 513 50. Mirleau, P. *et al.* Fitness in soil and rhizosphere of Pseudomonas fluorescens C7R12 compared  
514 with a C7R12 mutant affected in pyoverdine synthesis and uptake. *FEMS Microbiology Ecology*  
515 **34**, 35–44 (2000).
- 516 51. Banin, E., Vasil, M. L. & Greenberg, E. P. Iron and Pseudomonas aeruginosa biofilm formation.  
517 *Proceedings of the National Academy of Sciences* **102**, 11076–11081 (2005).
- 518 52. Sass, G. *et al.* Studies of Pseudomonas aeruginosa mutants indicate pyoverdine as the central  
519 factor in inhibition of Aspergillus fumigatus biofilm. *Journal of Bacteriology* **200** (2018).
- 520 53. Sexton, D. J. & Schuster, M. Nutrient limitation determines the fitness of cheaters in bacterial  
521 siderophore cooperation. *Nature Communications* **8**, 230 (2017).
- 522 54. Butaitė, E., Kramer, J., Wyder, S. & Kümmerli, R. Environmental determinants of pyoverdine  
523 production, exploitation and competition in natural Pseudomonas communities. *Environmental*  
524 *Microbiology* **20**, 3629–3642 (2018).
- 525 55. Zhang, X.-X. & Rainey, P. B. Genetic analysis of the histidine utilization (hut) genes in Pseu-  
526 domonas fluorescens SBW25. *Genetics* **176**, 2165–76 (2007).
- 527 56. Zhang, X.-X. & Rainey, P. B. Construction and validation of a neutrally-marked strain of  
528 Pseudomonas fluorescens SBW25. *Journal of Microbiological Methods* **71**, 78–81 (2007).
- 529 57. Stylianidou, S., Brennan, C., Nissen, S. B., Kuwada, N. J. & Wiggins, P. A. SuperSegger: robust  
530 image segmentation, analysis and lineage tracking of bacterial cells. *Molecular Microbiology*  
531 **102**, 690–700 (2016).

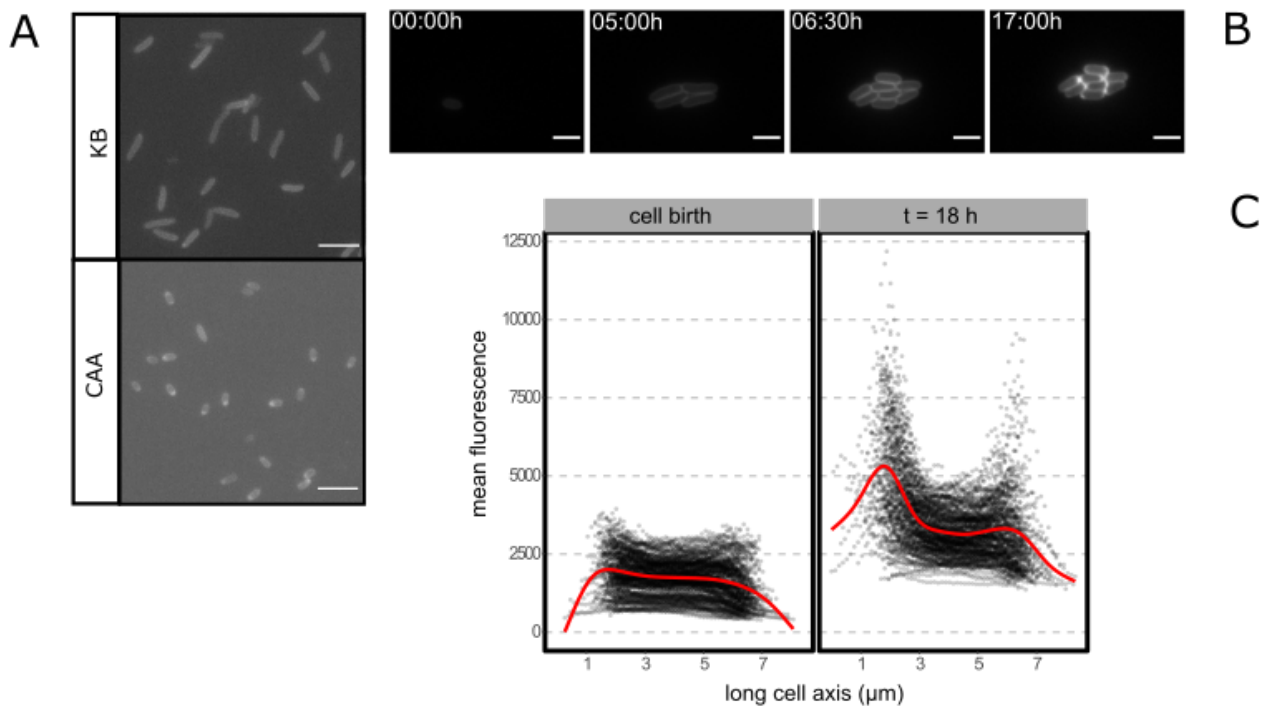

Figure 1: **Localization of pyoverdinin in *P. fluorescens* SBW25 at the cell pole.** A) Snapshots of experiments described in [13] where fitness assays of pyoverdinin producing SBW25 and a nonproducing *pvdS* defective mutant yield contrasting results depending on the culture medium. In both cases the environment is unstructured and ancestral SBW25 producer cells are rare, inoculated at 1%. A fitness advantage to nonproducing cells in KB was previously reported, but the reverse in CAA [13]. In KB (top) pyoverdinin nonproducing cells rarely showed evidence of polar accumulation of pyoverdinin, whereas (bottom) this was common in CAA cultured cells. Images were obtained from 3  $\mu$ l samples of these experiments imaged under fluorescence light to visualize the distribution of pyoverdinin. All scale bars correspond to 10  $\mu$ m. B) Fluorescence time-lapse images of a growing microcolony of SBW25 in a SMM agarose pad. Images represent selected time points including, respectively: the initial inoculum, exponential growth, end of exponential growth (i.e. the final number of cells in the colony) and end of time-lapse acquisition (18 h total) C) Mean fluorescence intensity along the long axis of cells in a growing microcolony, when the last generation of cells is born (left) and at the end of acquisition (t = 18 h, right). Black dotted line represents the fluorescence profile of individual cells, the red line represents a smoothed mean of all the cells.



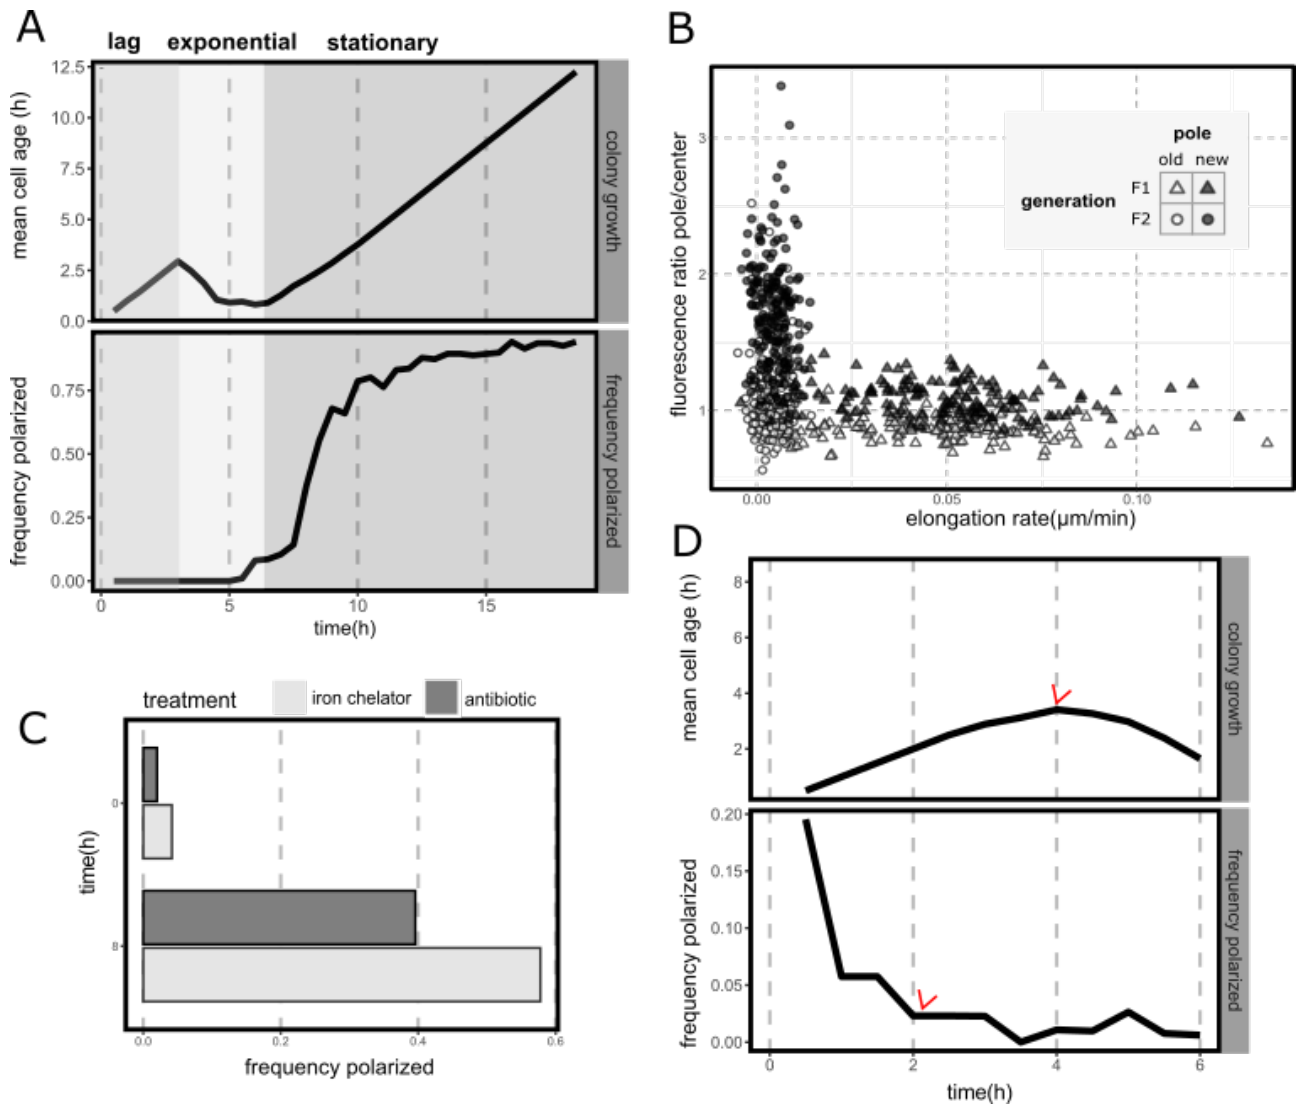

**Figure 2: Polarization is a reversible phenotype associated with arrest of cell division.** A) Polarization in different growth stages of a microcolony. Mean age of the cells in a growing microcolony of SBW25 (black line, top) and the corresponding frequency of polarized cells for each time point (black line, bottom). Colored panels represent the growth stages of the microcolony, from left to right: lag phase (generation F0), exponential phase (generation F1), and stationary phase (generation F2). N= 35, 159, 187 respectively. In all cases data has been filtered to exclude cells with segmentation errors or other artifacts that preclude proper analysis. Note that as microcolonies begin to form in exponential phase and cells are no longer isolated, overlap between adjacent cells creates regions of high fluorescence that could lead to classification errors. Nevertheless, visual inspection reveals that cells remain in a homogeneous state during exponential growth, with polarization onset being clearly associated to stationary phase. B) Elongation rate and accumulation of fluorescence at the cell pole of individual cells in a growing microcolony. Data extracted from A). Markers represent individual cells in different growth phases of the colony (F1, exponential, triangle markers; F2, stationary, circle markers) and the old (white markers) and new (black markers) cell pole. Elongation rate is represented by the average over the lifetime of a cell. Accumulation of fluorescence at the pole is represented by the maximum ratio over the lifetime of a cell of the sum of the pixels in the pole region and central region of a cell. These regions are defined by segmenting the cell and dividing it in 3 portions over the long axis, where the external 1/3 represent each pole and the remaining 1/3 represents the center. C) Polarization in response to chemical stresses related and unrelated to iron metabolism. Bars represent the frequency of polarized cells at the start of treatment and after 8h of treatment with either 100  $\mu\text{g}/\text{ml}$  2,2'-dipyridil (DP) (light bars) or 5  $\mu\text{g}/\text{ml}$  tetracycline (dark bars). No cell division was observed during treatment. N = 99 (t=0h), 94 (t = 8h) and N = 94 (t = 0h), 79 (t = 8h) for DP and tetracycline treatments respectively. D) Depolarization and subsequent growth of cells pre-treated with an iron chelator. Plot represents colony growth and polarization as in A). Cells were treated with 100  $\mu\text{g}/\text{ml}$  DP during 4h, washed and inoculated on a fresh SMM agarose pad. Data corresponds to five technical replicates i.e., five positions on the agarose pad. Red arrows indicate the time point where the colony overall starts growing (top) and where the majority of the cells are depolarized (bottom). Total initial number of cells N=87.

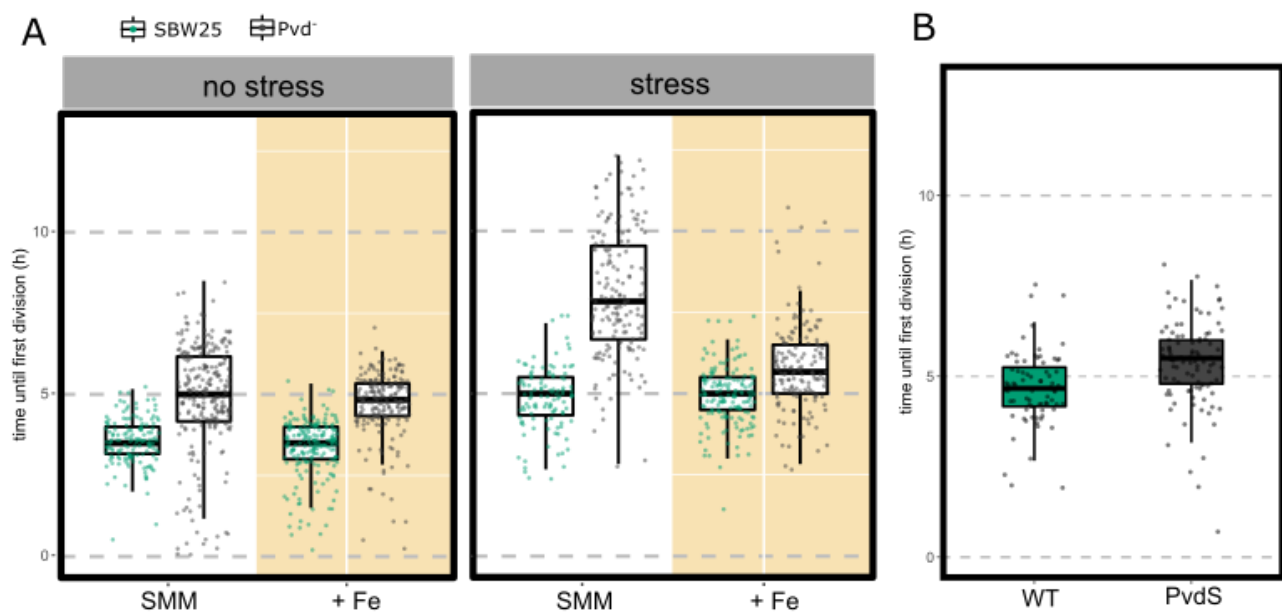

Figure 3: **Pyoverdinin polarization facilitates recovery of growth after stress.** A) time until first division (lag time) of SBW25 (green) and pyoverdinin defective mutant *pvdS229(D77N)*, termed Pvd<sup>-</sup> (gray) under different treatments and conditions. Prior to inoculation cells were either grown in the usual culture medium SMM (no stress) or treated with DP for 4h (stress). This treatment was previously demonstrated to induce polarization while preventing cell division. Cells were then inoculated on a fresh agarose pad, supplemented with 0.45 mM Fe<sub>2</sub>[SO<sub>4</sub>]<sub>3</sub> where labeled "+ Fe" (yellow background) or in unmodified SMM medium (labeled "SMM", white background). Dots represent individual cell values, box plots represent the associated distribution (median, 25th and 75h percentiles) N = 145, 261, 199, 193, 111, 168, 156, 156 respectively from left to right. B) time until first division of SBW25 (green) and Pvd<sup>-</sup> mutants co-inoculated in a fresh agarose pad after separate stress treatment. Pvd<sup>-</sup> mutants were labeled with a red fluorescent protein to allow identification of individual cells on the pad. Dots and box plots as in A). N = 175 total cells.

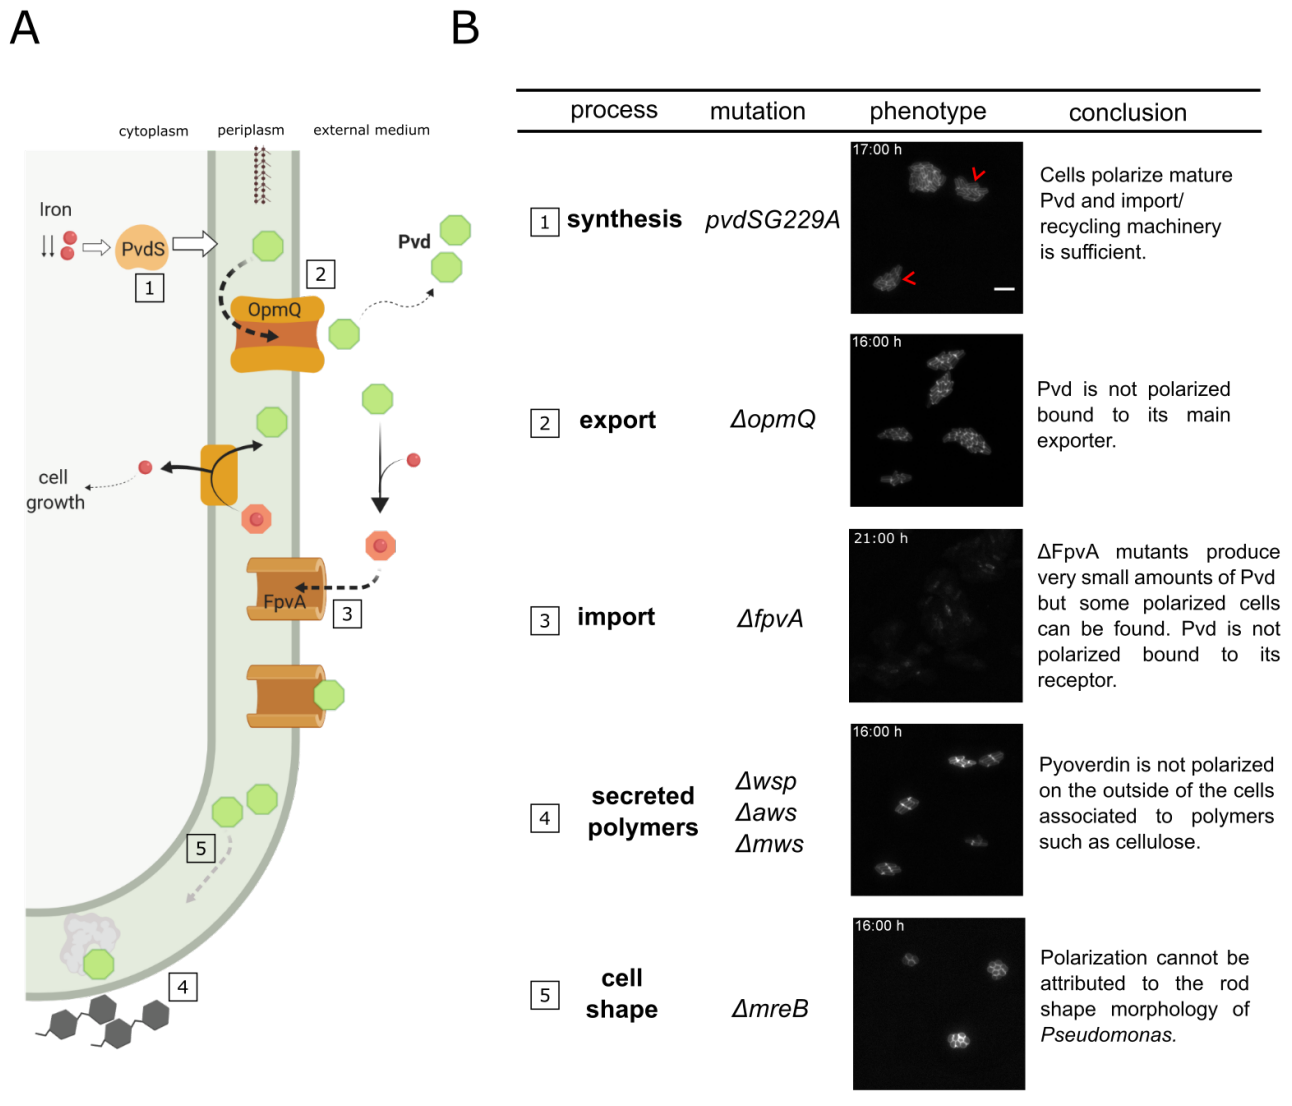

Figure 4: **Towards untangling the mechanism of polarization.** A) Cartoon depicting a simplified version of the pyoverdinin pathway emphasizing potential mechanisms for pyoverdinin polarization. 1. Pyoverdinin (Pvd) synthesis starts in the periplasm in response to iron scarcity mediated by the transcription factor PvdS. Pyoverdinin is then secreted to the bacterial periplasm, where it matures and becomes fluorescent. 2. Periplasmic pyoverdinin is exported into the external medium by a complex that includes the transporter OpmQ. There, it chelates insoluble iron ( $\text{Fe}^{3+}$ ). 3. Ferripyoverdinin complexes (no longer fluorescent) are then imported back into the periplasm after binding to the receptor FpvA. This receptor is known to also bind free pyoverdinin [7]. In the periplasm, iron is extracted and pyoverdinin is again recycled into the external medium by OpmQ. Polarization might also be caused by mechanisms unrelated to the pyoverdinin pathway: 4. SBW25 is known to secrete polymers such as cellulose where pyoverdinin molecules could be trapped [23]. 5. Pyoverdinin could accumulate at the cell poles due to the rod shape of SBW25. An alternative option is presented, where pyoverdinin could bind another yet unidentified periplasmic protein (in gray). B) Mutants associated to the main processes depicted in A) and their phenotype with regards to pyoverdinin polarization. Mutants were grown on an agarose pad as described and fluorescence images displaying pyoverdinin were taken at the time points indicated in the photo. The pyoverdinin non-producing mutant *pvdSG229A(D77N)* was co-inoculated with SBW25 to enable access of the mutant to pyoverdinin. Mutants were tagged with red a fluorescent protein, mutant colonies are labeled with a red arrow on the image.

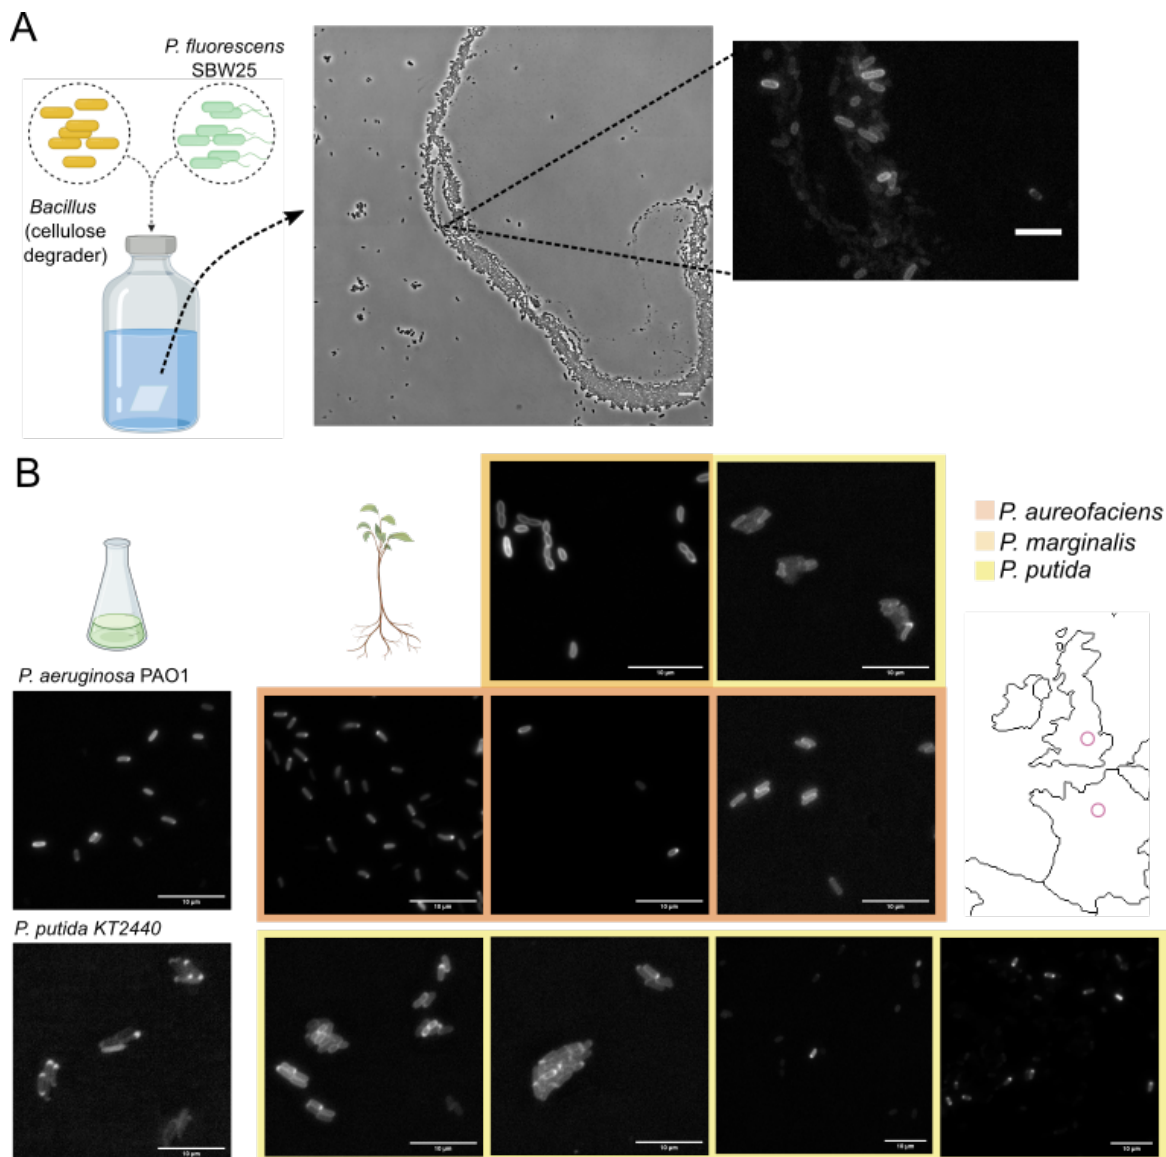

**Figure 5: Polarization is evident in SBW25 in a multispecies community and is a common phenotype in related species of the genus *Pseudomonas*** A) Polarized SBW25 cells in a multispecies community with interdependencies. SBW25 and a cellulose-degrading *Bacillus* strain isolated from a compost heap in Paris, France [30] were co-cultured in glass vials with minimal medium and cellulose paper as the only carbon source. The community was periodically sampled to assess the polarization state of SBW25. A representative image obtained after 28 days of growth is displayed, where both strains are visible (left, phase contrast image) and in a magnified region where pyoverdinin distribution in SBW25 is visualized (right, fluorescence image). B) Qualitative polarization assessment in species of *Pseudomonas* other than SBW25. A collection of laboratory (left) and natural (right) strains were tested for polarization in conditions equivalent to SBW25 and adapted to each isolate: SMM amended with the iron chelator DP where indicated, in liquid medium or on agarose pads as previously described, and observed by fluorescence microscopy. Natural isolates were collected in Oxford, UK [31] (first and second row) and in Paris, France [30] (Bottom row)(locations are roughly marked with a pink circle on the map). Color represents the identified *Pseudomonas* species. left) Polarization test in commonly used laboratory strains: *P. aeruginosa* PAO1 (tested in SMM agarose pad with 1000  $\mu\text{g/ml}$  DP for 7:30 h), and *P. putida* KT2440 (SMM agarose pad, 24h). right) Polarization test in natural isolates, left to right and top to bottom: U106 (liquid KB medium, 24 h), U177 (SMM agarose pad, 24 h), U149 (liquid SMM with DP 100  $\mu\text{g/ml}$ , 24 h), U180 (liquid SMM with DP 100  $\mu\text{g/ml}$ , 24), U181 (SMM agarose pad, 16 h), T24 V1a (SMM agarose pad, 24 h), T24 V9b (SMM agarose pad, 24 h), T24 H1b (SMM agarose pad, 24 h), T24 H9b (liquid SMM, 24 h).
